# Supplementary material
Source: publisher figshare collection journal article supplement (https://gsajournals.figshare.com/ndownloader/files/16832489)
Supplement: Supplementary file 1 [file 16832489]

**TABLE S2.** MEAN SQUARE ERROR OF THE PREDICTED EGBVS (MSEP) IN THE VALIDATION SET (GENERATION 2) FOR THE SCENARIO 0 (SC0) WITH 10 QTLS PER CHROMOSOME UNDERLYING THE TRAIT.

| Modelsa | MSEP |
| --- | --- |
| SNP-BLUP | 0.0074 (0.0010) |
| W10 | 0.0066 (0.0009) |
| W20 | 0.0064 (0.0009) |
| W40 | 0.0066 (0.0009) |
| LD | 0.0065 (0.0009) |
| W10-LD | 0.0062 (0.0009) |
| W20-LD | 0.0065 (0.0009) |
| W40-LD | 0.0064 (0.0009) |

aW10= categorical model with window of 10 SNPs, W20= categorical model with window of 20 SNPS, W40= categorical model with window of 40 SNPS, LD= continuous model with LD estimates, W10-LD= combined model with window of 10 SNPs and LD estimates, W20-LD= combined model with window of 20 SNPs and LD estimates, W40-LD= combined model with window of 40 SNPs and LD estimates.
